# Supplementary material for: Advancing vapor-deposited perovskite solar cellsviamachine learning
Source: Royal Society of Chemistry journal article supplement (doi:10.1039/d3ta00027c), 2023-01-01
Supplement: d3ta00027c1.pdf [file d3ta00027c1.pdf]

## Supporting Information

### **Advancing vapor-deposited perovskite solar cells via machine learning**

Jiazheng Wang <sup>a</sup>, Yuchen Qi <sup>a</sup>, Haofeng Zheng <sup>a</sup>, Ruilong Wang <sup>a</sup>, Siyou Bai <sup>a</sup>, Yanan Liu <sup>a</sup>, Qi Liu <sup>a</sup>, Jin Xiao <sup>a</sup>, Dechun Zou <sup>b</sup>, and Shaocong Hou <sup>a\*</sup>

<sup>a</sup>. *School of Electrical Engineering and Automation, Wuhan University, Wuhan 430072, China; Wuhan University Shenzhen Research Institute. E-mail: [sc.hou@whu.edu.cn](mailto:sc.hou@whu.edu.cn)\**

<sup>b</sup>. *Beijing National Laboratory for Molecular Sciences, College of Chemistry and Molecular Engineering, Peking University, Beijing 100871*

## Datasets used in this work

| Article                                                                               | Method                | Substrate | HTL          | HTL-2 | Perovskite          | ETL                 | ETL-2            | Back contact | Annealing temperature/°C | Pressure/mbar    | thickness/nm | Jsc/[mA cm <sup>-2</sup> ] | Voc/V | FF    | PCE (best) % | Structure(Normal/Inverse) |
|---------------------------------------------------------------------------------------|-----------------------|-----------|--------------|-------|---------------------|---------------------|------------------|--------------|--------------------------|------------------|--------------|----------------------------|-------|-------|--------------|---------------------------|
| 2017 IEEE Regional Symposium on Micro and Nanoelectronics (RSM). IEEE, 2017: 195-198. | Sequential deposition | FTO       | Spiro-OMeTAD |       | MAPbI <sub>3</sub>  | TiO <sub>2</sub>    |                  | Au           | 70                       | 10 <sup>-6</sup> | no           | 16.57                      | 0.8   | 0.65  | 7.75         | Normal                    |
| ACS Appl. Electron. Mater. 2021, 3, 3023–3033                                         | Coevaporation         | ITO       | NiO          |       | CsPbI <sub>3</sub>  | TiO <sub>2</sub>    |                  | Al           | 335                      | 10 <sup>-6</sup> | no           | 14.75                      | 0.93  | no    | 8.85         | Normal                    |
| ACS Appl. Energy Mater. 2020, 3, 1476–1483                                            | Sequential deposition | FTO       | Spiro-OMeTAD |       | MAPbI <sub>3</sub>  | mp-TiO <sub>2</sub> | ZnAl-MMOs        | Au           | no                       | 10 <sup>-6</sup> | no           | 22.51                      | 1.06  | 0.78  | 18.54        | Normal                    |
| ACS Appl. Energy Mater. 2020, 3, 1476–1483                                            | Sequential deposition | FTO       | Spiro-OMeTAD |       | MAPbI <sub>3</sub>  | mp-TiO <sub>2</sub> |                  | Au           | no                       | no               | no           | 19.9                       | 0.9   | 0.76  | 13.59        | Normal                    |
| ACS Appl. Energy Mater. 2020, 3, 2350–2359                                            | Sequential Deposition | FTO       | Spiro-OMeTAD |       | MAPbI <sub>3</sub>  | e-TiO <sub>2</sub>  |                  | Ag           | 180                      | no               | no           | 22.4                       | 0.877 | 0.595 | 11.7         | Normal                    |
| ACS Appl. Energy Mater. 2021, 4, 4333–4343                                            | Sequential Deposition | ITO       | Spiro-OMeTAD |       | MAPbI <sub>3</sub>  | C60                 |                  | Au           | 100                      | no               | 230          | 17                         | 0.927 | 0.654 | 10.3         | Normal                    |
| ACS Appl. Energy Mater. 2022, 5, 8049–8056                                            | Sequential Deposition | FTO       |              | 0     | CsPbBr <sub>3</sub> | SnO <sub>2</sub>    |                  | Carbon       | 300                      | no               | no           | 7.73                       | 1.467 | no    | 9.41         | Normal                    |
| ACS Appl. Mater. Interfaces 2015, 7, 25770–25776                                      | Sequential Deposition | FTO       | Spiro-OMeTAD |       | MAPbI <sub>3</sub>  | TiO <sub>2</sub>    |                  | Ag           | 110                      | no               | 100          | 21.26                      | 0.962 | 0.66  | 13.5         | Normal                    |
| ACS Appl. Mater. Interfaces 2018, 10, 26293–26302                                     | Coevaporation         | FTO       | Spiro-OMeTAD |       | MAPbI <sub>3</sub>  | PCBM                | TiO <sub>2</sub> | Au           | 100                      | 10 <sup>-6</sup> | 500          | 21.3                       | 1.007 | 0.75  | 17.1         | Normal                    |

|                                                       |                       |     |              |      |                             |         |         |      |    |     |                  |    |     |       |       |        |       |         |
|-------------------------------------------------------|-----------------------|-----|--------------|------|-----------------------------|---------|---------|------|----|-----|------------------|----|-----|-------|-------|--------|-------|---------|
| ACS Appl. Mater. Interfaces 2018, 10, 26293–26302     | Coevaporation         | FTO | Spiro-OMeTAD |      | 0 MAPbI3                    | TiO2    |         | 0 Au |    | 100 | 10 <sup>-6</sup> |    | 380 | 9.7   | 0.965 | 0.63   | 5.9   | Normal  |
| ACS Appl. Mater. Interfaces 2019, 11, 28851–28857     | Dual source           | FTO | Spiro-OMeTAD |      | 0 MAPbI3                    | C60     |         | 0 Ag | no |     | 10 <sup>-5</sup> | no |     | 20    | 0.98  | 0.8    | 15.7  | Normal  |
| ACS Appl. Mater. Interfaces 2020, 12, 20456–20461     | Single source         | FTO | Spiro-OMeTAD |      | 0 MA0.25FA0.75PbI2.75Br0.25 | TiO2    | SnO2    | Au   |    | 27  | no               | no |     | 23.4  | 1.04  | 0.726  | 17.2  | Normal  |
| ACS Appl. Mater. Interfaces 2020, 12, 20456–20461     | Single source         | FTO | Spiro-OMeTAD |      | 0 MAPbI3                    | TiO2    | SnO2    | Au   |    | 27  | no               |    | 500 | 20.3  | 1.04  | 0.764  | 16.2  | Normal  |
| ACS Appl. Mater. Interfaces 2020, 12, 22730–22740     | Sequential deposition | ITO | NiO          |      | 0 MAPbI3                    | PCBM    | PEI     | Ag   |    | 50  | no               | no |     | 20.1  | 1.04  | 0.751  | 15.7  | Normal  |
| ACS Appl. Mater. Interfaces 2020, 12, 22730–22740     | Sequential deposition | ITO | NiO          |      | 0 FACsPbX3                  | PCBM    | PEI     | Ag   |    | 100 | no               | no |     | 21.6  | 0.95  | 0.744  | 15.2  | Normal  |
| ACS Appl. Mater. Interfaces 2020, 12, 39261–39272     | Coevaporation         | ITO | MeO-2PACz    |      | 0 MAPbI3                    | C60     | BCP     | Cu   |    | 40  | 10 <sup>-6</sup> |    | 750 | 22.43 | 1.15  | 0.796  | 20.5  | Inverse |
| ACS Appl. Mater. Interfaces 2021, 13, 20034–20042     | Sequential deposition | ITO | Spiro-OMeTAD | Cu2O | CsPbBr3                     | ZnO     |         | 0 Au |    | 150 | no               |    | 250 | 5.75  | 1.34  | 0.737  | 5.67  | Normal  |
| ACS Appl. Mater. Interfaces 2021, 13, 20034–20042     | Sequential deposition | ITO | Spiro-OMeTAD |      | 0 CsPbBr3                   | ZnO     |         | 0 Au |    | 150 | no               |    | 250 | 5.46  | 1.3   | 0.7044 | 5     | Normal  |
| ACS Appl. Mater. Interfaces 2015, 7, 44, 24726–24732  | Sequential deposition | FTO | Spiro-OMeTAD |      | 0 MAPbI3                    | mp-TiO2 | bl-TiO2 | Ag   | no |     | 10 <sup>-6</sup> |    | 280 | 20.17 | 1.03  | 0.72   | 15.6  | Normal  |
| ACS Appl. Mater. Interfaces 2020, 12, 45, 50684–50691 | Coevaporation         | FTO | NiOx         |      | 0 FA0.2MA0.8PbIxCI3-x       | PCBM    |         | 0 Ag | no |     | 10 <sup>-6</sup> |    | 160 | 21.19 | 1.12  | 0.786  | 18.65 | Inverse |
| ACS Appl. Mater. Interfaces 2020, 12, 50, 55830–55837 | Sequential deposition | ITO | PC61BM       | BCP  | FAPbI3                      | NiOx    |         | 0 Ag |    | 150 | 10 <sup>-6</sup> | no |     | 23.29 | 1.04  | 0.76   | 18.41 | Normal  |

|                                     |                       |     |              |                |                          |          |     |      |    |     |                    |    |     |       |       |       |  |       |         |
|-------------------------------------|-----------------------|-----|--------------|----------------|--------------------------|----------|-----|------|----|-----|--------------------|----|-----|-------|-------|-------|--|-------|---------|
| ACS Energy Lett. 2017, 2, 2799–2804 | Dual source           | FT0 | Spiro-OMeTAD |                | 0 FAPbI3                 | C60      |     | 0 Ag |    | 170 | no                 |    | 370 | 22.1  | 1.01  | no    |  | 15.8  | Normal  |
| ACS Energy Lett. 2018, 3, 214–219   | Coevaporation         | ITO | TaTm         | TaTm: F6-TCNNQ | MAPb (Br0.5I0.5)3        | C60:PhIm | C60 | Au   |    | 90  | no                 |    | 250 | 11.4  | 1.207 | 0.769 |  | 10.6  | Normal  |
| ACS Energy Lett. 2018, 3, 214–219   | Coevaporation         | ITO | TaTm         | TaTm: F6-TCNNQ | MAPb (Br0.2I0.8)3        | C60:PhIm | C60 | Au   |    | 90  | no                 |    | 250 | 17.3  | 1.12  | 0.823 |  | 15.9  | Normal  |
| ACS Energy Lett. 2018, 3, 214–219   | Coevaporation         | ITO | TaTm         | TaTm: F6-TCNNQ | MAPbI3                   | C60:PhIm | C60 | Au   |    | 90  | no                 |    | 500 | 19.6  | 1.095 | 0.813 |  | 17.5  | Normal  |
| ACS Energy Lett. 2019, 4, 2748–2756 | Coevaporation         | ITO | PEDOT:PSS    |                | (FA1–xCsx)(Sn1–yPby)I3   | PCBM     | BCP | Ag   |    | 450 | $5 \times 10^{-6}$ | no |     | 20.29 | 0.78  | 0.74  |  | 11.48 | Inverse |
| ACS Energy Lett. 2020, 5, 2498–2504 | Coevaporation         | ITO | PTAA         |                | FA0.7Cs0.3Pb(I0.9Br0.1)3 | PCBM     | BCP | Ag   |    | 150 | no                 |    | 10  | 23    | 1.06  | 0.746 |  | 18.2  | Inverse |
| ACS Energy Lett. 2020, 5, 710.      | Dual source           | FT0 | Spiro-OMeTAD |                | 0 MAPbI3                 | C60      |     | 0 Au | no |     | no                 |    | 490 | 21.7  | 1.08  | 0.778 |  | 18.2  | Normal  |
| ACS Energy Lett. 2021, 6, 827–836   | Coevaporation         | ITO | MoO3         | TaTm           | FA(1–n)CsnPb(I1–xBrx)3   | C60      | BCP | Ag   | no |     | no                 | no |     | 18    | 1.184 | 0.79  |  | 16.8  | Inverse |
| ACS Energy Lett. 2022, 7, 1903–1911 | Coevaporation         | ITO | PTAA         |                | FA1–yCsyPb(I1–xClx)3     | C60      | BCP | Ag   |    | 135 | no                 | no |     | 23    | 1.06  | 0.79  |  | 19.3  | Inverse |
| ACS Omega 2017, 2, 4464–4469        | Sequential Deposition | FT0 | P3HT         |                | 0 CsPbI3                 | TiO2     |     | 0 Ag |    | 350 | $4 \times 10^{-6}$ |    | 200 | 12.06 | 0.71  | 0.67  |  | 5.71  | Normal  |
| Adv. Energy Mater. 2014, 4, 1400345 | Dual source           | ITO | PEDOT:PSS    | poly-TPD       | MAPbI3                   | PCBM     |     | 0 Au | no |     | $10^{-6}$          |    | 300 | 18.2  | 1.09  | 0.75  |  | 14.8  | Inverse |

|                                      |                       |     |           |                |                                 |          |     |          |    |                      |     |       |       |        |       |         |
|--------------------------------------|-----------------------|-----|-----------|----------------|---------------------------------|----------|-----|----------|----|----------------------|-----|-------|-------|--------|-------|---------|
| Adv. Energy Mater. 2014, 4, 1400345  | Coevaporation         | ITO | PEDOT:PSS | 0              | MAPbI3                          | PCBM+C60 |     | 0 Au     | no | 10 <sup>-6</sup>     | 300 | 19.5  | 1     | 0.52   | 10    | Inverse |
| Adv. Energy Mater. 2014, 4, 1400345  | Coevaporation         | ITO | PEDOT:PSS | 0              | MAPbI3                          | 0        |     | 0 Au     | no | 10 <sup>-6</sup>     | 300 | 12.4  | 0.6   | 0.58   | 4.6   | Inverse |
| Adv. Energy Mater. 2016, 6, 1502087  | Sequential deposition | FTO | 0         | 0              | MAPbI3                          | TiO2     |     | 0 carbon |    | 100 no               | 500 | 21.27 | 1.04  | 0.65   | 14.38 | Normal  |
| Adv. Energy Mater. 2016, 6, 1502202  | Coevaporation         | FTO | 0         | 0              | CsPbI3                          | TiO2     |     | 0 Au     |    | 250 10 <sup>-6</sup> | 550 | 8.7   | 0.959 | 0.56   | 4.7   | Normal  |
| Adv. Energy Mater. 2016, 6, 1502202  | Dual source           | FTO | 0         | 0              | CsPbI3                          | c-TiO2   |     | 0 Au     |    | 250 10 <sup>-6</sup> | 97  | 8.7   | 0.956 | 0.56   | 4.7   | Normal  |
| Adv. Energy Mater. 2018, 8, 1703054  | Sequential deposition | ITO | PTAA      | 0              | MAPbI3                          | PCBM     |     | 0 Al     |    | 100 10 <sup>-6</sup> | 500 | 22.97 | 1.04  | 0.7    | 16.7  | Inverse |
| Adv. Energy Mater. 2018, 8, 1703054  | Sequential deposition | ITO | PEDOT:PSS | 0              | MAPbI3                          | PCBM     |     | 0 Al     |    | 100 10 <sup>-6</sup> | no  | 20.1  | 0.88  | 0.79   | 14    | Inverse |
| Adv. Energy Mater. 2018, 8, 1703506  | Coevaporation         | ITO | TaTm      | TaTm: F6-TCNNQ | Cs0.5FA0.4MA0.1Pb(10.83Br0.17)3 | C60:PhIm | C60 | Au       | no | no                   | 430 | 17    | 1.146 | 0.82   | 16    | Normal  |
| Adv. Energy Mater. 2018, 8, 1703506  | Coevaporation         | ITO | TaTm      | TaTm: F6-TCNNQ | Cs0.5FA0.5Pb(10.83Br0.17)3      | C60:PhIm | C60 | Au       | no | no                   | 430 | 18.7  | 0.922 | 0.56   | 9.7   | Normal  |
| Adv. Energy Mater. 2019, 9, 1802995  | Dual source           | ITO | NiOx      | 0              | MAPbI3                          | C60      |     | 0 Au     |    | 100 10 <sup>-5</sup> | 400 | 21.4  | 1.08  | 0.72   | 15.4  | Inverse |
| Adv. Energy Mater. 2019, 9, 1900555  | Dual source           | ITO | PTAA      | 0              | CsPbI3                          | C60      | BCP | Cu       | no | 10 <sup>-6</sup>     | 500 | 17.8  | 0.96  | 0.73   | 12.5  | Inverse |
| Adv. Energy Mater. 2021, 11, 2100299 | Coevaporation         | ITO | PTAA      | 0              | CsPbI3+10%PEAI                  | PCBM     | BCP | Ag       |    | 100 10 <sup>-6</sup> | 500 | 17.33 | 1.09  | 0.7752 | 14.62 | Inverse |

|                                      |                       |     |              |   |               |      |     |      |    |     |                   |     |       |       |        |       |         |
|--------------------------------------|-----------------------|-----|--------------|---|---------------|------|-----|------|----|-----|-------------------|-----|-------|-------|--------|-------|---------|
| Adv. Energy Mater. 2021, 11, 2101460 | Coevaporation         | ITO | MeO-2PACz    | 0 | MAxFA1-xPbI3  | C60  | BCP | Cu   |    | 145 | 10 <sup>-6</sup>  | 750 | 24.26 | 1.04  | 0.7632 | 19.2  | Inverse |
| Adv. Eng. Mater. 2020, 2000990       | Sequential deposition | FTO | Spiro-OMeTAD | 0 | MAPbI3        | SnO2 |     | 0 Au |    | 200 | <10 <sup>-5</sup> | no  | 18.47 | 0.98  | 0.74   | 13.51 | Normal  |
| Adv. Eng. Mater. 2020, 2000990       | Sequential deposition | FTO | Spiro-OMeTAD | 0 | MAPbI3        | SnO2 |     | 0 Au |    | 250 | <10 <sup>-5</sup> | no  | 17.7  | 0.98  | 0.67   | 11.73 | Normal  |
| Adv. Eng. Mater. 2020, 2000990       | Sequential deposition | FTO | Spiro-OMeTAD | 0 | MAPbI3        | SnO2 |     | 0 Au |    | 150 | <10 <sup>-5</sup> | no  | 17.28 | 0.95  | 0.65   | 10.73 | Normal  |
| Adv. Eng. Mater. 2020, 2000990       | Sequential deposition | FTO | Spiro-OMeTAD | 0 | MAPbI3        | SnO2 |     | 0 Au |    | 300 | <10 <sup>-5</sup> | no  | 17.04 | 0.95  | 0.61   | 10.09 | Normal  |
| Adv. Eng. Mater. 2020, 2000990       | Sequential deposition | FTO | Spiro-OMeTAD | 0 | MAPbI3        | SnO2 |     | 0 Au |    | 100 | <10 <sup>-5</sup> | no  | 17.23 | 0.89  | 0.43   | 6.67  | Normal  |
| Adv. Eng. Mater. 2020, 2000990       | Sequential deposition | FTO | Spiro-OMeTAD | 0 | MAPbI3        | SnO2 |     | 0 Au |    | 70  | <10 <sup>-5</sup> | 478 | 8.66  | 0.74  | 0.64   | 4.27  | Normal  |
| Adv. Funct. Mater. 2021, 31, 2103252 | Coevaporation         | ITO | PTAA         | 0 | MAPbI3        | PCBM | BCP | Ag   |    | 100 | 10 <sup>-5</sup>  | no  | 22.3  | 1.134 | 0.807  | 20.41 | Inverse |
| Adv. Funct. Mater. 2021, 31, 2103252 | Coevaporation         | ITO | Spiro-TTB    | 0 | MAPbI3        | PCBM | BCP | Ag   |    | 100 | 10 <sup>-5</sup>  | 160 | 22.05 | 1.131 | 0.812  | 20.27 | Inverse |
| Adv. Funct. Mater. 2021, 31, 2103252 | Coevaporation         | ITO | MeO-2PACz    | 0 | MAPbI3        | PCBM | BCP | Ag   |    | 100 | 10 <sup>-5</sup>  | 750 | 22.3  | 1.121 | 0.824  | 20.61 | Inverse |
| Adv. Mater. 2015, 27, 7221–7228      | Sequential deposition | FTO | Spiro-OMeTAD | 0 | CH3NH3PbIyBrx | TiO2 |     | 0 Au | no | no  |                   | 380 | 21.8  | 1.025 | 0.74   | 16.9  | Normal  |

|                                                   |                       |     |              |           |   |                                |      |     |    |     |                    |                    |     |       |       |        |       |         |
|---------------------------------------------------|-----------------------|-----|--------------|-----------|---|--------------------------------|------|-----|----|-----|--------------------|--------------------|-----|-------|-------|--------|-------|---------|
| Adv. Mater. 2015, 27, 7221–7228                   | Sequential deposition | FTO | Spiro-OMeTAD |           | 0 | MAPbI3                         | TiO2 |     | 0  | Au  | no                 | no                 | no  | 20.7  | 0.983 | 0.71   | 14.7  | Normal  |
| Adv. Mater. 2016, 28, 3653–3661                   | Sequential deposition | FTO | Spiro-OMeTAD |           | 0 | (IC2H4NH3)2(CH3NH3)n-1PbnI3n+1 | TiO2 |     | 0  | Au  | 100                | no                 | no  | 14.88 | 0.883 | 0.69   | 9.03  | Normal  |
| Adv. Mater. 2017, 29, 1605290                     | Dual source           | ITO | TAPC         | TAPC:MoO3 | 0 | CsPbI2Br                       | Ca   | C60 | Ag | 260 | 2×10 <sup>-6</sup> |                    | 400 | 15.2  | 1.15  | 0.67   | 11.8  | Normal  |
| Adv. Mater. 2017, 29, 1605290                     | Dual source           | ITO | TAPC         | TAPC:MoO3 | 0 | CsPbI3                         | Ca   | C60 | Ag | 325 | 2×10 <sup>-6</sup> |                    | 300 | 12.5  | 1.13  | 0.63   | 9.4   | Normal  |
| Adv. Mater. 2018, 30, 1800855                     | Dual source           | ITO | Spiro-OMeTAD |           | 0 | CsPbBr3                        | ZnO  |     | 0  | Au  | 180                | no                 | 450 | 7.01  | 1.44  | 0.77   | 7.78  | Normal  |
| Adv. Mater. 2020, 1907769                         | Sequential deposition | ITO | Spiro-OMeTAD |           | 0 | FA1-xMAxPbI3                   | SnO2 |     | 0  | Ag  | 90                 | no                 | no  | 24.6  | 1.096 | 0.775  | 20.9  | Normal  |
| Adv. Mater. 2020, 2007126                         | Sequential deposition | ITO | Spiro-OMeTAD |           | 0 | FAPbI3                         | SnO2 |     | 0  | Au  | 145                | no                 | 400 | 15.1  | 0.947 | 0.506  | 7.2   | Normal  |
| AIP Advances 8, 095226 (2018)                     | Sequential deposition | ITO | PTAA         |           | 0 | MAPbI3                         | PCBM | Ti  | Au | 110 | 6×10 <sup>-6</sup> | no                 |     | 21.14 | 1.019 | 0.749  | 16.13 | Inverse |
| Chem. Mater. 2020, 32, 8641–8652                  | Coevaporation         | ITO | MoO3         | TaTm      | 0 | CsPbI2Br                       | C60  | BCP | Ag | 150 | 10 <sup>-6</sup>   |                    | 250 | 14.3  | 0.958 | 0.731  | 10    | Inverse |
| Chemical Engineering Journal 448 (2022) 137676    | Sequential deposition | ITO | Spiro-OMeTAD |           | 0 | (FAPbI3)0.97(MAPbBr3)0.03      | SnO2 |     | 0  | Ag  | no                 | 6×10 <sup>-6</sup> | 500 | 23.53 | 1.1   | 0.7887 | 20.48 | Normal  |
| Chemical Engineering Journal, 2018, 336: 732-740. | Sequential deposition | FTO | Spiro-OMeTAD |           | 0 | MAPbI3                         | ZnO  |     | 0  | Au  | 80                 | no                 | no  | 19.31 | 1.038 | 0.7109 | 14.25 | Normal  |
| Coatings 2020, 10, 1163                           | Coevaporation         | FTO | Spiro-OMeTAD |           | 0 | MAPbI3                         | TiO2 |     | 0  | Au  | 100                | 10 <sup>-6</sup>   | no  | 21.4  | 1.108 | 0.747  | 18.3  | Normal  |

|                                              |                       |     |              |               |   |                 |          |       |   |        |    |     |                     |    |     |       |       |        |       |        |
|----------------------------------------------|-----------------------|-----|--------------|---------------|---|-----------------|----------|-------|---|--------|----|-----|---------------------|----|-----|-------|-------|--------|-------|--------|
| Coatings 2020, 10, 1163.                     | Dual source           | FTO | Spiro-OMeTAD |               | 0 | MAPbI3          | TiO2     |       | 0 | Au     |    | 100 | no                  |    | 650 | 22.06 | 1.115 | 0.77   | 19    | Normal |
| Dalton Trans., 2015, 44,17841                | Sequential deposition | FTO | Spiro-OMeTAD |               | 0 | MAPbI3          | TiO2     |       | 0 | Ag     |    | 70  | no                  | no |     | 21.14 | 0.939 | 0.7306 | 14.51 | Normal |
| Dalton Trans., 2015,44, 3967-3973            | Sequential deposition | FTO |              | 0             | 0 | NiO(MAPbI3)     | TiO2     |       | 0 | carbon | no |     | no                  |    | 450 | 18.2  | 0.89  | 0.71   | 11.4  | Normal |
| Dalton Trans., 2015,44, 3967-3973            | Sequential deposition | FTO |              | 0             | 0 | ZrO2 (MAPbI3)   | TiO2     |       | 0 | carbon | no |     | 10 <sup>-6</sup>    |    | 443 | 16.4  | 0.818 | 0.6    | 8.2   | Normal |
| Electronic Materials Letters (2019) 15:56–60 | Coevaporation         | FTO | Spiro-OMeTAD |               | 0 | CsPbI2Br        | TiO2     |       | 0 | Au     |    | 300 | 10 <sup>-6</sup>    |    | 400 | 10.9  | 1.1   | 0.49   | 5.7   | Normal |
| Electronic Materials Letters (2019) 15:56–60 | Dual source           | FTO | Spiro-OMeTAD |               | 0 | CsPbI2Br        | TiO2     |       | 0 | Au     |    | 300 | 10 <sup>-6</sup>    |    | 400 | 10.9  | 1.1   | 0.49   | 5.7   | Normal |
| Energy Environ. Sci., 2016, 9, 3456--3463    | Coevaporation         | ITO | TaTm         | TaTm:F6-TCNNQ |   | MAPbI3          | C60:PhIm | C60   |   | Ag     | no |     | no                  |    | 750 | 22.08 | 1.14  | 0.805  | 20.3  | Normal |
| Energy Environ. Sci., 2022, 15, 1144         | Sequential deposition | FTO | Spiro-OMeTAD |               | 0 | M2FAn-1Pbn13n+1 | TiO2     |       | 0 | Au     |    | 150 | no                  | no |     | 25.04 | 1.07  | 0.7198 | 19.33 | Normal |
| Energy Environ. Sci.2014, 7, 3989.           | Dual source           | FTO | Spiro-OMeTAD |               | 0 | MAPbI3-xClx     | TiO2     |       | 0 | Ag     | no |     | no                  |    | 330 | 17    | 1.09  | 0.566  | 9.9   | Normal |
| Energy Technol. 2019, 7, 1800986             | Single-source         | FTO | Spiro-OMeTAD |               | 0 | CsPbI2Br        | TiO2     | PCBM  |   | Au     |    | 280 | 3×10 <sup>-5</sup>  | no |     | 15.4  | 1.07  | 0.72   | 12.2  | Normal |
| Energy Technol. 2020, 8, 1900878             | Coevaporation         | FTO | Spiro-OMeTAD |               | 0 | MAPbI3          | Nb2O5    |       | 0 | Au     |    | 100 | <2×10 <sup>-5</sup> |    | 210 | 18.9  | 1.028 | 0.73   | 14.2  | Normal |
| Energy Technol. 2020, 8, 1900878             | Coevaporation         | FTO | Spiro-OMeTAD |               | 0 | MAPbI3          | PCBM     | Nb2O5 |   | Au     |    | 100 | <2×10 <sup>-5</sup> |    | 210 | 21.7  | 1.013 | 0.7    | 15.4  | Normal |



|                                                             |                       |     |              |   |                              |        |        |   |    |     |                       |     |       |       |      |       |        |
|-------------------------------------------------------------|-----------------------|-----|--------------|---|------------------------------|--------|--------|---|----|-----|-----------------------|-----|-------|-------|------|-------|--------|
| Energy Technol. 2020, 8, 1900878                            | Coevaporation         | FTO | Spiro-OMeTAD | 0 | MAPbI3                       | PCBM   |        | 0 | Au | 100 | $<2 \times 10^{-5}$   | 210 | 18.3  | 0.967 | 0.6  | 10.8  | Normal |
| Energy Technol. 2020, 8, 1900878                            | Coevaporation         | FTO | Spiro-OMeTAD | 0 | MAPbI3                       | PCBM   | TiO2   |   | Au | 100 | $<2 \times 10^{-5}$   | 210 | 19.9  | 0.965 | 0.69 | 13.3  | Normal |
| Energy Technol. 2020, 8, 1900878                            | Coevaporation         | FTO | Spiro-OMeTAD | 0 | MAPbI3                       | TiO2   |        | 0 | Au | 100 | $<2 \times 10^{-5}$   | 425 | 17.1  | 0.856 | 0.56 | 8.3   | Normal |
| IEEE JOURNAL OF PHOTOVOLT AICS, VOL. 7, NO. 1, JANUARY 2017 | Sequential Deposition | ITO | PEDOT:PSS    | 0 | MAPbI3                       | PCBM   | BCP    |   | Ag | 100 | $5.3 \times 10^{-6}$  | no  | 11.8  | 0.89  | no   | 7.46  | Normal |
| Int J Energy Res. 2020;1-11.                                | Sequential deposition | FTO | Spiro-OMeTAD | 0 | MAPbI3                       | TiO2   |        | 0 | Ag | no  | $2.67 \times 10^{-5}$ | 660 | 21.2  | 1.2   | 0.76 | 19.43 | Normal |
| J Mater Sci (2021) 56:15205-15214                           | Sequential deposition | FTO | Spiro-OMeTAD | 0 | MAPbI3                       | ZnO    |        | 0 | Au | no  | no                    | 650 | 22.2  | 1.082 | 0.74 | 17.75 | Normal |
| J Mater Sci (2022) 57:1936-1946                             | Sequential deposition | FTO | Spiro-OMeTAD | 0 | MAXFA1-xPbI3(MA0.5FA0.5PbI3) | ZnO    | c-TiO2 |   | Ag | 120 | $<10^{-6}$            | no  | 21.2  | 0.99  | 0.67 | 14.1  | Normal |
| J. Alloys Compd. 2020, 818, 152903.                         | Single source         | FTO | Spiro-OMeTAD | 0 | CsPbBr3                      | TiO2   |        | 0 | Au | 300 | $10^{-5}$             | 650 | 7.79  | 1.37  | 0.81 | 8.65  | Normal |
| J. Mater. Chem. A, 2015, 3, 23888-23894                     | Dual source           | FTO | CuPc         | 0 | MAPbI3                       | C60    |        | 0 | Au | no  | $6.65 \times 10^{-5}$ | 370 | 18.91 | 1.04  | 0.78 | 15.33 | Normal |
| J. Mater. Chem. A, 2015, 3, 9401-9405                       | Sequential Deposition | FTO | Spiro-OMeTAD | 0 | MAPbI3                       | c-TiO2 |        | 0 | Au | 120 | $10^{-6}$             | 300 | 22.27 | 1     | 0.72 | 16.03 | Normal |
| J. Mater. Chem. A, 2018, 6, 21143-21148                     | Sequential Deposition | FTO | Spiro-OMeTAD | 0 | Cs0.24FA0.76PbI3-yBry        | SnOx   |        | 0 | Au | 160 | $10^{-6}$             | 315 | 22.88 | 1.06  | 0.71 | 17.29 | Normal |
| J. Mater. Chem. A, 2019, 7, 6920-6929                       | Sequential Deposition | FTO | Spiro-OMeTAD | 0 | Cs0.1FA0.9PbI2.9Br0.1        | SnO2   | C60    |   | Au | 150 | $10^{-6}$             | 400 | 20.5  | 0.94  | 0.69 | 13.3  | Normal |

|                                         |                       |     |              |                |                                                                           |        |         |      |    |                    |     |       |        |        |       |         |
|-----------------------------------------|-----------------------|-----|--------------|----------------|---------------------------------------------------------------------------|--------|---------|------|----|--------------------|-----|-------|--------|--------|-------|---------|
| J. Mater. Chem. A, 2016, 4, 5663.       | Dual source           | ITO | MoO3         | NPB            | MAPbI3                                                                    | C60    |         | 0 Al | no | $2 \times 10^{-6}$ | 550 | 20.1  | 1      | 0.65   | 14.5  | Inverse |
| J. Mater. Chem. C, 2020, 8, 7725–7733   | Coevaporation         | ITO | Spiro-TTB    | F6TCNNQ        | Cs <sub>0.1</sub> FAxPb <sub>1.2</sub> +xBr <sub>0.1</sub>                | C60    |         | 0 Ag |    | 100 $10^{-7}$      | no  | 19.5  | 1.07   | 0.797  | 16.6  | Inverse |
| J. Mater. Chem. C, 2020, 8, 7725–7733   | Coevaporation         | ITO | F6TCNNQ      | Spiro-TTB      | FA <sub>2+x</sub> Cs <sub>0.1</sub> Pb <sub>1.2</sub> +xBr <sub>0.1</sub> | C60    |         | 0 Ag |    | 100 $10^{-6}$      | 400 | 19.5  | 1.07   | 0.797  | 16.6  | Inverse |
| J. Name., 2012, 00, 1-3   5             | Sequential deposition | ITO | Spiro-OMeTAD |                | 0 MAPbI3                                                                  | SnO2   |         | 0 Ag |    | 70 no              | no  | 18.8  | 1.08   | 0.6    | 12.3  | Normal  |
| J. Name., 2013, 00, 1-3   1             | Sequential deposition | FTO | Spiro-OMeTAD |                | 0 MAPbI3                                                                  | c-TiO2 | Er-TiO2 | Au   |    | 120 no             | no  | 20.08 | 1.03   | 0.6731 | 14.06 | Normal  |
| J. Name., 2013, 00, 1-3   3             | Sequential deposition | FTO | Spiro-OMeTAD |                | 0 MAPbI3                                                                  | TiO2   |         | 0 Ag |    | 100 no             | no  | 20.9  | 0.993  | 0.73   | 14.61 | Normal  |
| J. Phys. Chem. C 2017, 121, 19642–19649 | Dual source           | FTO | P3HT         |                | 0 CsPbI2Br                                                                | c-TiO2 |         | 0 Au |    | 300 $10^{-6}$      | 230 | 11.5  | 1.01   | 0.67   | 7.7   | Normal  |
| J. Phys. Chem. C 2017, 121, 19642–19649 | Coevaporation         | FTO | Spiro-OMeTAD |                | 0 CsPbI2Br                                                                | c-TiO2 |         | 0 Au |    | 300 no             | 230 | 11.5  | 1.005  | 0.77   | 6.7   | Normal  |
| J. Phys. Chem. C 2021, 125, 23474–23482 | Sequential deposition | ITO | PTAA         |                | 0 MAPbI3                                                                  | PC61BM | BCP     | Ag   | no | $2 \times 10^{-6}$ | 160 | 21.94 | 1.07   | 0.7724 | 19.64 | Normal  |
| J. Phys. Chem. C 2021, 125, 23474–23482 | Sequential deposition | ITO | PTAA         |                | 0 MAPbI3                                                                  | PC61BM | BCP     | Ag   | no | $2 \times 10^{-6}$ | 250 | 20.53 | 1.02   | 0.7686 | 17.48 | Normal  |
| J. Phys. Chem. C 2021, 125, 23474–23482 | Sequential deposition | ITO | Cs-doped VOx |                | 0 MAPbI3                                                                  | PC61BM | BCP     | Ag   | no | $2 \times 10^{-6}$ | 660 | 20.71 | 0.91   | 0.7637 | 15.47 | Normal  |
| J. Phys. Chem. Lett. 2017, 8, 67–72     | Dual source           | FTO | P3HT         |                | 0 CsPbI3                                                                  | c-TiO2 |         | 0 Au |    | 320 no             | no  | 13.8  | 0.1063 | 0.716  | 10.5  | Normal  |
| J. Phys. Chem. Lett. 2018, 9, 1041–1046 | Dual source           | ITO | TaTm         | TaTm: F6-TCNNQ | MAPbI3                                                                    | TiO2   | C60     | Au   | no | $10^{-6}$          | 590 | 21.91 | 1.16   | 0.82   | 20.8  | Normal  |

|                                                                            |                           |     |              |     |                                                                                      |           |        |      |    |                         |     |     |       |       |        |       |         |
|----------------------------------------------------------------------------|---------------------------|-----|--------------|-----|--------------------------------------------------------------------------------------|-----------|--------|------|----|-------------------------|-----|-----|-------|-------|--------|-------|---------|
| J. Phys. Chem. Lett. 2021, 12, 10106–10111                                 | Sequential deposition     | ITO | C60          | BCP | EIG20/PHSCN                                                                          | PEDOT:PSS |        | 0 Ag | no | 6×10 <sup>-6</sup>      | no  |     | 21.9  | 0.81  | 0.76   | 13.5  | Normal  |
| Joule 2020, 4, 1035.                                                       | Dual source               | FTO | Spiro-OMeTAD |     | 0 MAPbI3                                                                             | SnO2      | PCBM   | Au   |    | 100 10 <sup>-5</sup>    | 300 |     | 23.3  | 1.12  | 0.777  | 20.28 | Normal  |
| Joule 4, 1035–1053, May 20, 2020                                           | Coevaporation             | FTO | Spiro-OMeTAD |     | 0 MAPbI3                                                                             | PCBM      | SnO2   | Au   |    | 100 10 <sup>-5</sup>    | 523 |     | 22.6  | 1.13  | 0.78   | 19.91 | Normal  |
| Joule 4, 1035–1053, May 20, 2020                                           | Coevaporation             | FTO | Spiro-OMeTAD |     | 0 MAPbI3                                                                             | PCBM      | TiO2   | Au   |    | 100 10 <sup>-5</sup>    | no  |     | 21.8  | 1.11  | 0.7751 | 18.75 | Normal  |
| Journal of Alloys and Compounds 818 (2020) 152903                          | Single-source evaporation | FTO | Spiro-OMeTAD |     | 0 CsPbBr3                                                                            | e-TiO2    |        | 0 Au |    | 300 no                  | 650 |     | 7.79  | 1.37  | 0.81   | 8.65  | Normal  |
| Journal of Alloys and Compounds 864 (2021) 158793                          | Sequential deposition     | FTO | Spiro-OMeTAD |     | 0 MAPbI3                                                                             | TiO2      | ZnO    | Au   | no | no                      | no  |     | 18.02 | 0.84  | 0.51   | 7.71  | Normal  |
| Journal of Alloys and Compounds 888 (2021) 161448                          | Dual source               | FTO | Spiro-OMeTAD |     | 0 MAPbI3                                                                             | e-TiO2    | m-TiO2 | Au   |    | 70                      | 1   | 375 | 22.2  | 1.07  | 0.66   | 15.6  | Normal  |
| Journal of Materials Science: Materials in Electronics (2019) 30:5487–5494 | Coevaporation             | FTO | PTAA         |     | 0 MAPbI3                                                                             | PCBM      |        | 0 Al |    | 30 7.3×10 <sup>-5</sup> | 660 |     | 22    | 1.03  | 0.77   | 17.4  | Inverse |
| Journal of Materials Science: Materials in Electronics (2019) 30:5487–5494 | Coevaporation             | FTO | PTAA         |     | 0 MAPbI3                                                                             | PCBM      |        | 0 Al |    | 50 1.2×10 <sup>-4</sup> | 350 |     | 21.4  | 1     | 0.77   | 16.5  | Inverse |
| Journal of Materials Science: Materials in Electronics (2019) 30:5487–5494 | Coevaporation             | FTO | PTAA         |     | 0 MAPbI3                                                                             | PCBM      |        | 0 Al |    | 75 2×10 <sup>-4</sup>   | 350 |     | 21.5  | 0.99  | 0.76   | 16    | Inverse |
| Journal of Power Sources 443 (2019) 227269                                 | Sequential Deposition     | FTO | CuPe         |     | 0 CsPbBr3                                                                            | e-TiO2    |        | 0 C  |    | 250 9×10 <sup>-6</sup>  | 500 |     | 7.59  | 1.328 | 0.752  | 7.58  | Normal  |
| Journal of Power Sources 520 (2022) 230783                                 | Sequential deposition     | FTO | NiO          |     | 0 Cs <sub>x</sub> MA <sub>1-x</sub> PbI <sub>3</sub>                                 | C60       |        | 0 Ag |    | 100 4×10 <sup>-6</sup>  | no  |     | 19.24 | 1.1   | 0.7212 | 15.26 | Normal  |
| Li et al., Sci. Adv. 8, eabo7422 (2022) 15 July 2022                       | Sequential deposition     | FTO | Spiro-OMeTAD |     | 0 Cs <sub>0.05</sub> Pb <sub>12.05</sub> -xCl <sub>x</sub> (2-CF <sub>3</sub> -PEAI) | SnO2      |        | 0 Au |    | 170 7×10 <sup>-3</sup>  | no  |     | 25.91 | 1.145 | 0.81   | 24.42 | Normal  |

|                                                                             |                          |     |                  |   |                                                                                 |                     |     |   |    |     |                       |     |       |       |        |       |         |
|-----------------------------------------------------------------------------|--------------------------|-----|------------------|---|---------------------------------------------------------------------------------|---------------------|-----|---|----|-----|-----------------------|-----|-------|-------|--------|-------|---------|
| Materials<br>2019, 12, 1394;<br>doi:10.3390/ma<br>12091394                  | Sequential<br>deposition | FTO | P3HT             | 0 | MAPi                                                                            | ZnO                 |     | 0 | Au | no  | $2 \times 10^{-5}$    | 300 | 13.2  | 1.22  | 0.6    | 9.4   | Normal  |
| Materials<br>2019, 12, 1394;<br>doi:10.3390/ma<br>12091394                  | Sequential<br>deposition | FTO | P3HT             | 0 | MAPi                                                                            | ZnO                 |     | 0 | Au | 140 | $2 \times 10^{-5}$    | 300 | 14    | 0.9   | 0.53   | 6.8   | Normal  |
| Materials<br>Letters 169<br>(2016)<br>236–240                               | Sequential<br>Deposition | FTO | Spiro-<br>OMeTAD | 0 | MAPbI <sub>x</sub> Cl <sub>3-x</sub>                                            | TiO <sub>2</sub>    |     | 0 | Au | 80  | no                    | no  | 14.64 | 1.01  | 0.6612 | 9.76  | Normal  |
| Materials<br>Letters 292<br>(2021) 129623                                   | Sequential<br>deposition | FTO | Spiro-<br>OMeTAD | 0 | CsFAMAPbI <sub>r</sub>                                                          | Li-SnO <sub>2</sub> |     | 0 | Au | no  | $< 10^{-6}$           | 900 | 22.89 | 0.958 | 0.7303 | 16.01 | Normal  |
| Materials<br>Science in<br>Semiconductor<br>Processing 148<br>(2022) 106839 | Sequential<br>Deposition | FTO | NiO              | 0 | Cs <sub>0.14</sub> FA <sub>0.86</sub><br>Pb(BrxI <sub>1-x</sub> ) <sub>3</sub>  | C60                 | BCP |   | Ag | 160 | no                    | 330 | 20.91 | 0.96  | 0.72   | 14.45 | Inverse |
| Nano Energy<br>(2016) 19,<br>88–97                                          | Single source            | ITO | PEDOT:PSS        | 0 | BA2MA3PbI <sub>13</sub>                                                         | PCBM                |     | 0 | Ag | no  | $6.65 \times 10^{-5}$ | 97  | 10.98 | 0.95  | 0.449  | 4.67  | Inverse |
| Nano Energy<br>2016, 19, 88.                                                | Sequential<br>Deposition | FTO | Spiro-<br>OMeTAD | 0 | MAPbI <sub>3</sub>                                                              | C60                 |     | 0 | Au | no  | $6.65 \times 10^{-5}$ | no  | 18.9  | 1.1   | 0.754  | 15.7  | Normal  |
| Nano Energy<br>2019, 65,<br>104015.                                         | Sequential<br>Deposition | FTO | Spiro-<br>OMeTAD | 0 | CsPbBr <sub>3</sub>                                                             | c-TiO <sub>2</sub>  |     | 0 | Ag | 350 | no                    | 300 | 9.78  | 1.498 | 0.7447 | 10.91 | Normal  |
| Nano Energy<br>48 (2018)<br>536–542                                         | Sequential<br>Deposition | FTO | Spiro-<br>OMeTAD | 0 | Cs <sub>0.15</sub> FA <sub>0.85</sub><br>PbI <sub>2.85</sub> Br <sub>0.15</sub> | c-TiO <sub>2</sub>  |     | 0 | Ag | 160 | $10^{-6}$             | no  | 22.82 | 1.06  | 0.75   | 18.22 | Normal  |
| Nano Energy,<br>2018, 49: 109-<br>116.                                      | Sequential<br>deposition | ITO | Spiro-<br>OMeTAD | 0 | MAPbI <sub>3</sub> -Z057                                                        | ZnO                 |     | 0 | Ag | 80  | $2.67 \times 10^{-5}$ | 220 | 19.96 | 1.09  | 0.7472 | 16.21 | Normal  |
| Nano Energy,<br>2018, 49: 109-<br>116.                                      | Sequential<br>deposition | ITO | Spiro-<br>OMeTAD | 0 | MAPbI <sub>3</sub>                                                              | ZnO                 |     | 0 | Ag | 80  | $2.67 \times 10^{-5}$ | 220 | 19.66 | 1.06  | 0.6418 | 13.4  | Normal  |
| Nano-Micro<br>Lett.<br>(2022)14:79                                          | Sequential<br>deposition | ITO | Spiro-<br>OMeTAD | 0 | PbI <sub>2</sub> :CsI                                                           | SnO <sub>2</sub>    |     | 0 | Ag | 135 | $8 \times 10^{-6}$    | 490 | 22.09 | 1.08  | 0.7601 | 18.13 | Normal  |
| Nanoscale,<br>2015, 7,<br>10699–10707                                       | Sequential<br>Deposition | ITO | PEDOT:PSS        | 0 | MAPbI <sub>3</sub>                                                              | PCBM                | BCP |   | Ag | 50  | $10^{-5}$             | 260 | 16.66 | 1.03  | 0.651  | 11.17 | Inverse |

|                                           |                       |     |              |          |   |                       |        |         |          |    |     |                    |     |       |      |       |       |         |
|-------------------------------------------|-----------------------|-----|--------------|----------|---|-----------------------|--------|---------|----------|----|-----|--------------------|-----|-------|------|-------|-------|---------|
| Nanoscale, 2015, 7, 10699–10707           | Sequential Deposition | ITO | PEDOT:PSS    |          | 0 | MAPbI3                | PCBM   | BCP     | Ag       |    | 60  | 10 <sup>-5</sup>   | 260 | 17.12 | 1    | 0.621 | 10.63 | Inverse |
| Nanoscale, 2015, 7, 10699–10707           | Sequential Deposition | ITO | PEDOT:PSS    |          | 0 | MAPbI3                | PCBM   | BCP     | Ag       |    | 70  | 10 <sup>-5</sup>   | 260 | 18.58 | 0.98 | 0.603 | 10.97 | Inverse |
| Nanoscale, 2017, 9, 12316–12323           | Coevaporation         | FTO | Spiro-OMeTAD |          | 0 | MAxCs1-xPbI3          | TiO2   |         | 0 Au     |    | 150 | 6×10 <sup>-6</sup> | 750 | 23.17 | 1.1  | 0.79  | 20.13 | Normal  |
| Nat. Photonics 2014, 8, 128.              | Dual source           | ITO | PEDOT:PSS    | poly-TPD |   | MAPbI3                | PCBM   |         | 0 Au     | no |     | 2×10 <sup>-6</sup> | 285 | 16.12 | 1.05 | 0.67  | 12    | Inverse |
| Nature 2013, 501, 395.                    | Dual source           | FTO | Spiro-OMeTAD |          | 0 | MAPbI3-xClx           | TiO2   |         | 0 Ag     |    | 100 | 10 <sup>-5</sup>   | 330 | 21.5  | 1.07 | 0.67  | 15.4  | Normal  |
| Organic Electronics 53 (2018) 26–34       | Sequential deposition | ITO | PEDOT:PSS    |          | 0 | MAPbI3(T-PbI2)        | PC61BM | C70-bis | Al       |    | 100 | 2×10 <sup>-6</sup> | no  | 21.01 | 1.04 | 0.76  | 16.61 | Inverse |
| Organic Electronics 53 (2018) 26–34       | Sequential deposition | ITO | PEDOT:PSS    |          | 0 | MAPbI3(P-PbI2)        | PC61BM | C70-bis | Al       |    | 100 | 2×10 <sup>-6</sup> | no  | 15.27 | 1.01 | 0.65  | 10.02 | Inverse |
| Organic Electronics 69 (2019) 208–215     | Sequential deposition | FTO | Spiro-OMeTAD |          | 0 | FAxMA1-xPbI3          | TiO2   |         | 0 Au     |    | 70  | no                 | 350 | 22.69 | 1.06 | 0.72  | 17.31 | Normal  |
| Organic Electronics 83 (2020) 105736      | Sequential deposition | ITO | Spiro-OMeTAD |          | 0 | FAxMA(1-x)PbIyBr(3-y) | SnO2   |         | 0 Ag     |    | 150 | no                 | 330 | 16.8  | 1.09 | 0.64  | 11.9  | Normal  |
| Phys. Status Solidi RRL 2021, 15, 2000449 | Sequential Deposition | ITO | PTAA         |          | 0 | MAPbI3                | C60    | BCP     | Ag       |    | 100 | 4×10 <sup>-6</sup> | no  | 23.11 | 1.09 | 0.77  | 19.4  | Inverse |
| Results in Physics 17 (2020) 103122       | Coevaporation         | FTO | NiOx         |          | 0 | MAPbI3                | PCBM   | BCP     | Ag       | no |     | 6×10 <sup>-6</sup> | no  | 16.19 | 0.99 | 0.77  | 12.28 | Inverse |
| RSC Adv. 2021, 11, 3380.                  | Single source         | FTO |              | 0        | 0 | CsPbBr3               | TiO2   |         | 0 Carbon |    | 250 | 8×10 <sup>-6</sup> | no  | 9.27  | 1.36 | 0.71  | 8.95  | Normal  |
| RSC Adv., 2014, 4, 28964–28967            | Sequential Deposition | ITO |              | 0        | 0 | MAPbI3                | C60    |         | 0 Ag     |    | 100 | no                 | 350 | 13.6  | 0.8  | 0.5   | 5.4   | Inverse |
| RSC Adv., 2016, 6, 47459–47467            | Sequential deposition | FTO | Spiro-OMeTAD |          | 0 | MAPbI3                | PCBM   | TiO2    | Ag       |    | 120 | 10 <sup>-6</sup>   | 600 | 19.8  | 1.01 | 0.773 | 15.59 | Normal  |

|                                                                 |                       |     |              |      |   |                                           |        |         |   |        |    |     |                      |    |     |        |       |        |       |
|-----------------------------------------------------------------|-----------------------|-----|--------------|------|---|-------------------------------------------|--------|---------|---|--------|----|-----|----------------------|----|-----|--------|-------|--------|-------|
| RSC Adv.2020, 10, 8905                                          | Sequential Deposition | FTO | Spiro-OMeTAD |      | 0 | CsPbBr3                                   | TiO2   |         | 0 | Ag     |    | 335 | 10 <sup>-5</sup>     |    | 600 | 6.49   | 1.42  | 0.79   | 7.22  |
| S. Chae et al. / Materials Today Energy 14 (2019) 100341        | Sequential deposition | ITO | P3HT         |      | 0 | MAPbI3                                    | PCBM   | BCP     |   | Ag     | no |     | 10 <sup>-6</sup>     | no |     | 19.198 | 0.91  | 0.7772 | 13.58 |
| S. Chae et al. / Materials Today Energy 14 (2019) 100341        | Sequential deposition | ITO | PEDOT:PSS    |      | 0 | MAPbI3                                    | PCBM   | BCP     |   | Ag     |    | 140 | 10 <sup>-6</sup>     | no |     | 16.985 | 0.84  | 0.7957 | 11.35 |
| S. Prathapani et al. / Applied Materials Today 7 (2017) 112–119 | Sequential deposition | FTO | Spiro-OMeTAD |      | 0 | MAPbI3                                    | c-TiO2 | mp-TiO2 |   | Au     |    | 70  | no                   |    | 600 | 12.4   | 0.82  | 0.45   | 4.61  |
| Sol. Energy Mater. Sol. Cells 2018, 187, 1.                     | Dual source           | FTO | PCBM         |      | 0 | CsPbBr3                                   | TiO2   |         | 0 | Ag     |    | 500 | 5×10 <sup>-5</sup>   |    | 600 | 6.97   | 1.27  | 0.785  | 6.95  |
| Sol. Energy Mater. Sol. Cells 2020, 206, 110317.                | Sequential Deposition | FTO | PCBM         |      | 0 | CsPbBr3                                   | TiO2   |         | 0 | Carbon |    | 300 | no                   |    | 600 | 7.37   | 1.545 | 0.822  | 9.35  |
| Sol. RRL 2019, 3, 1900030                                       | Sequential deposition | FTO |              | 0    | 0 | CsPbBr3/CsPbBr3-CsPb2Br5/CsPbBr3-Cs4PbBr6 | c-TiO2 |         | 0 | carbon |    | 350 | 10 <sup>-6</sup>     |    | 300 | 9.24   | 1.461 | 0.7539 | 10.17 |
| Sol. RRL 2019, 3, 1900030                                       | Sequential deposition | FTO |              | 0    | 0 | CsPbBr3/CsPbBr3-CsPb2Br5                  | c-TiO2 |         | 0 | carbon |    | 350 | 10 <sup>-6</sup>     |    | 300 | 8.22   | 1.417 | 0.722  | 8.41  |
| Sol. RRL 2019, 3, 1900030                                       | Sequential deposition | FTO |              | 0    | 0 | CsPbBr3                                   | c-TiO2 |         | 0 | carbon |    | 350 | 10 <sup>-6</sup>     |    | 300 | 7.11   | 1.372 | 0.7299 | 7.12  |
| Sol. RRL 2019, 3, 1900050                                       | Sequential Deposition | FTO | Spiro-OMeTAD |      | 0 | MAyFA1-yPbIxBr3-x                         | SnO2   |         | 0 | Au     |    | 130 | 2.5×10 <sup>-3</sup> |    | 400 | 19.16  | 1.02  | 0.773  | 15.14 |
| Sol. RRL 2019, 3, 1900050                                       | Sequential deposition | FTO | CuPc         |      | 0 | MA0.56FA0.44PbI2.67Br0.33                 | SnO2   |         | 0 | Au     |    | 130 | 4×10 <sup>-6</sup>   |    | 400 | 19.16  | 1.02  | 0.773  | 15.14 |
| Sol. RRL 2019, 3, 1900050                                       | Sequential Deposition | FTO | Spiro-OMeTAD |      | 0 | MAPbIxBr3-x                               | SnO2   |         | 0 | Au     |    | 130 | 2.5×10 <sup>-3</sup> |    | 400 | 17.17  | 0.99  | 0.686  | 11.66 |
| Sol. RRL 2020, 4, 1900283                                       | Coevaporation         | ITO | MoO3         | PTAA |   | FA (Pb0.5Sn0.5)I3                         | C60    | BCP     |   | Ag     | no |     | 3×10 <sup>-6</sup>   |    | 385 | 24.3   | 0.73  | 0.733  | 13.98 |

|                                                          |                       |     |              |   |   |                                                                  |        |          |          |    |     |                      |     |       |       |       |       |
|----------------------------------------------------------|-----------------------|-----|--------------|---|---|------------------------------------------------------------------|--------|----------|----------|----|-----|----------------------|-----|-------|-------|-------|-------|
| Sol. RRL 2021, 5, 2000552                                | Sequential Deposition | ITO | CuPC         |   | 0 | MAPbI3                                                           | C60    | BCP      | Ag       |    | 100 | $4 \times 10^{-6}$   | 175 | 23.34 | 1.108 | 0.785 | 20.3  |
| Sol. RRL 2021, 5, 2100102                                | Coevaporation         | FTO | Spiro-OMeTAD |   | 0 | $\text{Cs}_{0.14}\text{FA}_{0.86}\text{Pb}(\text{BryI}_{1-y})_3$ | SnO2   |          | 0 Au     |    | 180 | no                   | 450 | 22.53 | 1.041 | 0.74  | 17.3  |
| Sol. RRL 2022, 6, 2100842                                | Coevaporation         | FTO | Spiro-OMeTAD |   | 0 | MAPbI3                                                           | PCBM   | ALD-SnO2 | Au       |    | 100 | $2.8 \times 10^{-4}$ | 500 | 22.67 | 1.08  | 0.788 | 19.3  |
| Sol. RRL 2022, 6, 2200020                                | Sequential deposition | FTO |              | 0 | 0 | CsPbI2Br                                                         | TiO2   |          | 0 carbon |    | 250 | no                   | no  | 15.7  | 1.312 | 0.74  | 15.24 |
| Sol. RRL 2022, 6, 2200020                                | Sequential deposition | FTO |              | 0 | 0 | CsPbI3                                                           | TiO2   |          | 0 carbon | no | no  | no                   | 750 | 20.4  | 1.075 | no    | 15.35 |
| Solar Energy 178 (2019) 56–60                            | Sequential Deposition | FTO | Spiro-OMeTAD |   | 0 | $\text{FA}_x\text{MA}_{1-x}\text{PbI}_3$                         | c-TiO2 |          | 0 Au     |    | 100 | $10^{-6}$            | no  | 22.4  | 0.98  | 0.73  | 15.8  |
| Solar Energy 215 (2021) 179–188                          | Sequential Deposition | FTO | Spiro-OMeTAD |   | 0 | $\text{MAPbI}_x\text{Cl}_{3-x}$                                  | TiO2   |          | 0 Ag     |    | 130 | $10^{-6}$            | 150 | 20.55 | 0.907 | 0.545 | 10.14 |
| Solar Energy 215 (2021) 179–188                          | Sequential Deposition | FTO | Spiro-OMeTAD |   | 0 | MAPbI3                                                           | TiO2   |          | 0 Ag     |    | 130 | $10^{-6}$            | 150 | 19.65 | 0.862 | 0.517 | 8.76  |
| Solar Energy Materials and Solar Cells 187 (2018) 1–8    | Coevaporation         | FTO | Spiro-OMeTAD |   | 0 | CsPbBr3                                                          | c-TiO2 |          | 0 Au     |    | 500 | $5 \times 10^{-3}$   | 600 | 6.97  | 1.27  | 0.78  | 6.95  |
| Solar Energy Materials and Solar Cells 187 (2018) 1–8    | Coevaporation         | FTO | Spiro-OMeTAD |   | 0 | CsPbBr3                                                          | c-TiO2 |          | 0 Au     |    | 400 | $5 \times 10^{-3}$   | 600 | 6     | 1     | no    | 5.48  |
| Solar Energy Materials and Solar Cells 187 (2018) 1–8    | Coevaporation         | FTO | Spiro-OMeTAD |   | 0 | CsPbBr3                                                          | c-TiO2 |          | 0 Au     |    | 550 | $5 \times 10^{-3}$   | 600 | 5.5   | 0.79  | no    | 4.84  |
| Solar Energy Materials and Solar Cells 206 (2020) 110317 | Sequential Deposition | FTO |              | 0 | 0 | CsPbBr3                                                          | TiO2   |          | 0 Carbon |    | 300 | $10^{-6}$            | 600 | 7.37  | 1.545 | 0.822 | 9.35  |
| Solar Energy Materials and Solar Cells 206 (2020) 110317 | Sequential Deposition | FTO |              | 0 | 0 | CsPbBr3                                                          | TiO2   |          | 0 Carbon |    | 250 | $10^{-6}$            | 600 | 6.8   | 1.477 | 0.785 | 7.89  |

## Feature Importance Chart and SHAP Chart

**Figure S1.**  $J_{SC}$  (a),  $V_{OC}$  (c), and FF (e) in order of feature importance. The effects of each feature on  $J_{SC}$  (b),  $V_{OC}$ (d) and FF(f) were analyzed using SHAP. Each bar in the left column of the graph indicates the absolute magnitude of importance of the feature, and the ranking is from the largest to the smallest absolute value of importance. Each point in the graph in the right column represents a data sample, the darker the color represents the larger the value of the feature, the horizontal coordinate is the SHAP value, and the vertical coordinate is the different features.



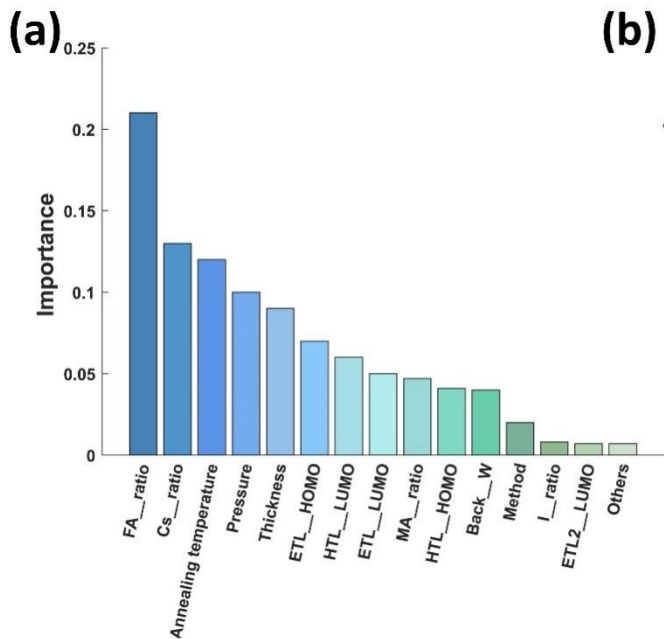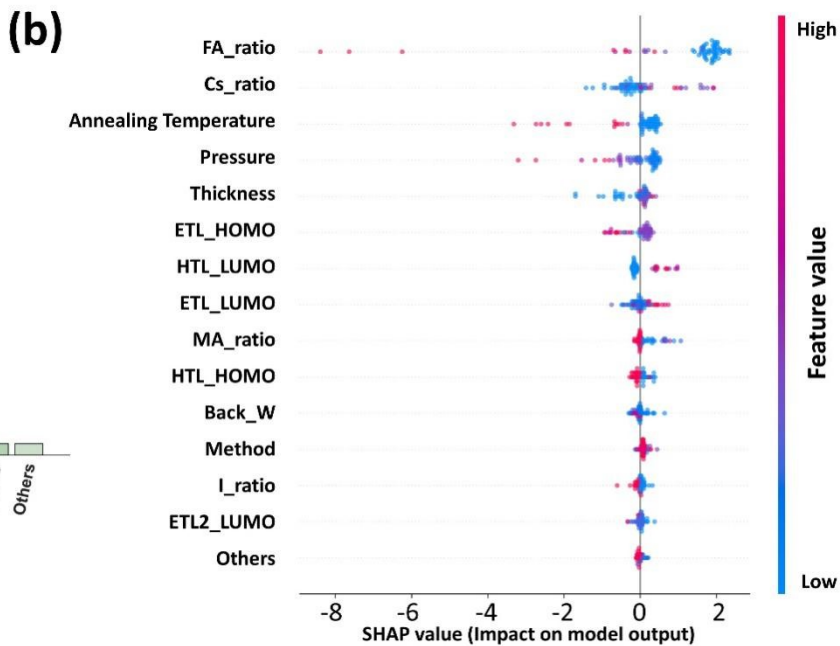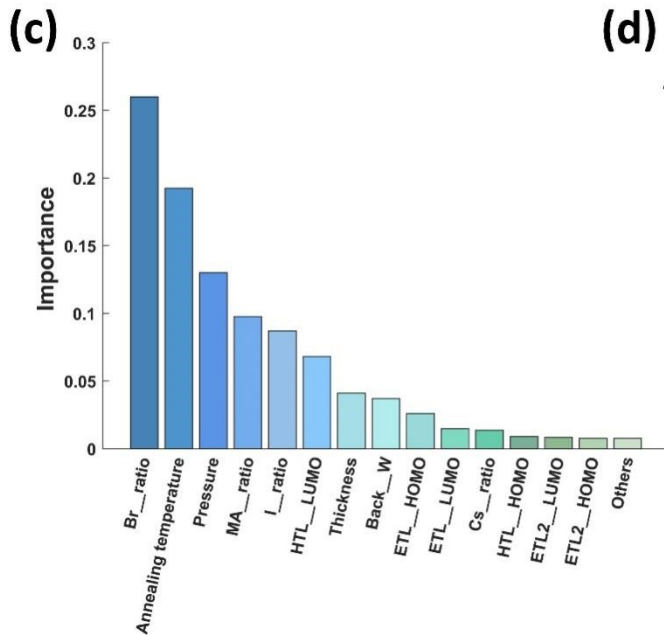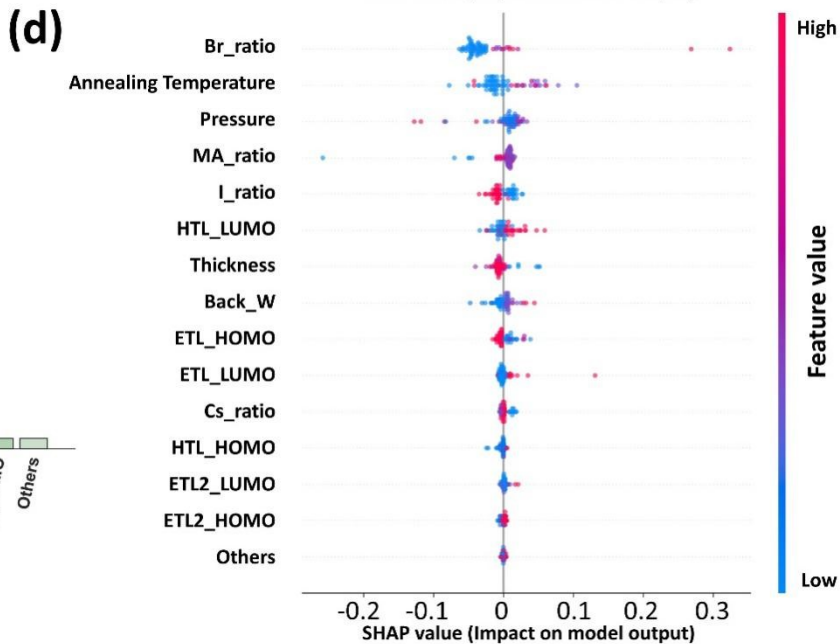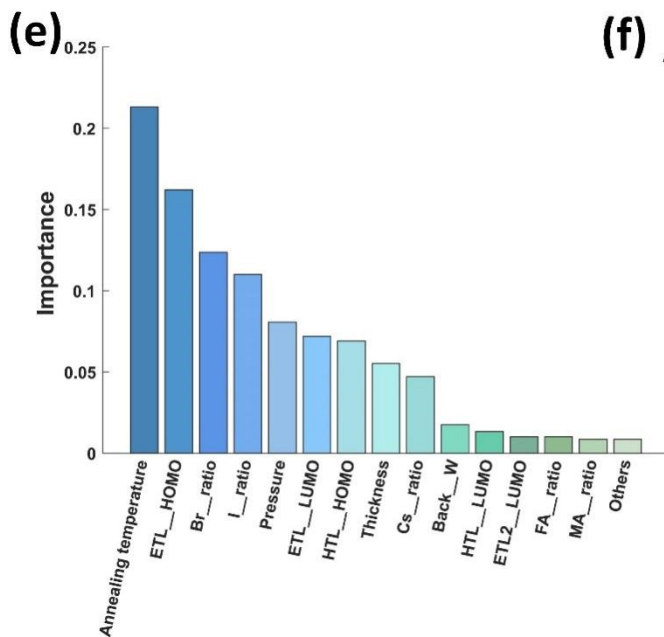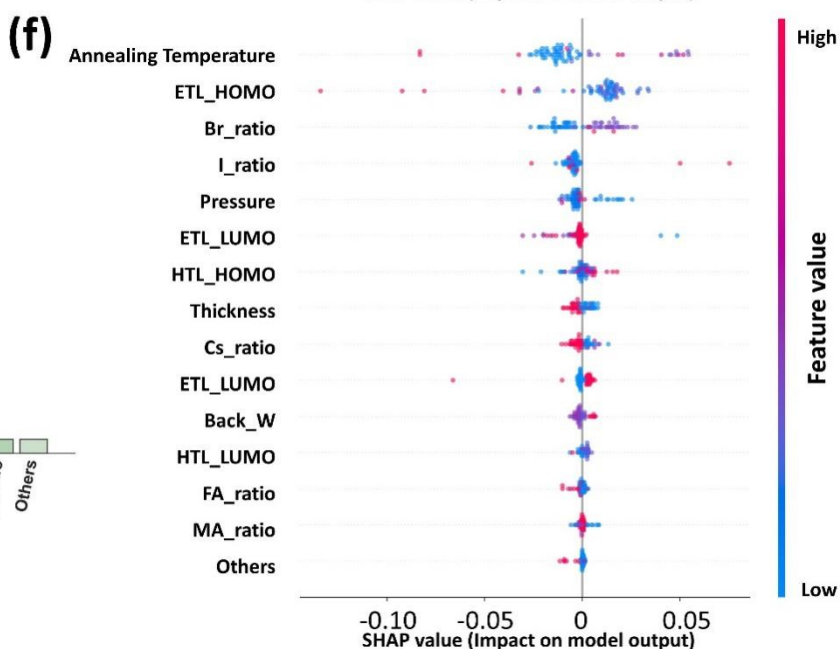

## Mathematical part

$$r = \frac{\sum_{i=1}^n (\varphi_i - \bar{\varphi})(\theta_i - \bar{\theta})}{\sqrt{\sum_{i=1}^n (\varphi_i - \bar{\varphi})^2} \sqrt{\sum_{i=1}^n (\theta_i - \bar{\theta})^2}} \quad (1)$$

$\varphi_i$  and  $\theta_i$  are true value and predicted value of the i-th sample,  $\bar{\varphi}$  and  $\bar{\theta}$  are the mean value of true values and predicted values.

$$RMSE = \sqrt{\frac{1}{N} \sum_{i=1}^N (\text{true}_i - \text{predicted}_i)^2} \quad (2)$$

N represents the volume of data.

## Model Test

**Figure S2.** Comparative histogram of PCE values.

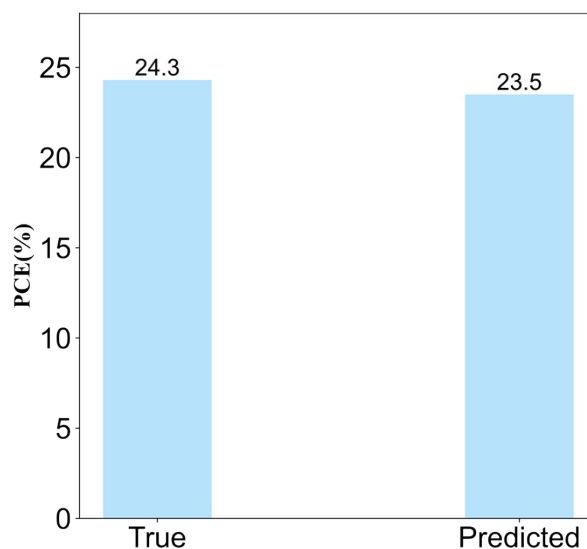

We verified our model with the most recent results from the just-accepted, unedited paper in *Advanced Materials* by L Tan, which is published during the peer-reviewing period and thus outside of our database. Our model predicts PCE value of 23.5%, very close to the experimental PCE value of 24.3%. The relative error is only 3.3%, which reflects the excellent prediction ability of our model for unknown samples and the excellent generalization performance of the model.

## Machine learning model

RF is a classification algorithm, which belongs to the Bagging algorithm in ensemble learning, that is, the guided aggregation algorithm. RF consists of multiple decision trees, and each decision tree is different. When building a decision tree, we randomly select a part of the samples from the training data with replacement, and do not use all the features of the data, but randomly select parts features for training. And the final predicted value is determined by the prediction of the aggregation tree.

LR algorithm is a binary classification algorithm, and the decision function is represented by the conditional probability distribution  $P(Y|X)$ . It non-linearly maps the operation result of linear regression to the  $[0,1]$  interval through the Sigmoid function, that is, the prediction category is expressed in the form of probability. LR is usually based on gradient descent algorithm to obtain training weights, and then uses decision function to make probabilistic prediction of categories.

DTree algorithm is based on the binary division strategy, and represents the result of data classification in a tree structure. Each decision point implements a test function with discrete output. DTree applies the information gain criterion on each node of the decision tree to select features, constructs the decision tree recursively, and the final fitted function is a step function between partitions.

GBoost uses the negative gradient of the loss function as an approximation of the residual in the boosting tree algorithm to train weak classifiers, thereby constructing a decision tree, and finally obtaining the predicted value according to the results of all weak classifiers. Each calculation of GBoost is to reduce the previous residual, and then build a new model in the direction of residual reduction.

ABoost is an adaptive algorithm. In the ABoost algorithm, the wrongly classified samples of the previous basic classifier will be given a higher weight, while the correctly classified samples will be given a lower weight, and the weighted samples will be used again to train the next basic classifier. At the same time, a new weak classifier is added in each round until a predetermined small enough error rate is reached or a pre-specified maximum number of iterations is reached.

XGBoost algorithm is similar to the GBoost algorithm, the difference is that GBoost reduces the residual at the fastest speed by continuously adding new trees, while XGBoost can define the loss function artificially, just need to know the first derivative and second derivative of the function for the parameters, which greatly improves the generalization ability of the model.

MLP is a deep learning algorithm in which each node is a perceptron, simulating the basic functions of neurons in biological neural networks, and these neurons are also divided into input layer, intermediate layer and output layer. A neural network trains the net with a feature vector as input, passes that vector to the hidden layer, then

computes the result through weights and activation functions, and passes the result to the next layer until the output. The weights, synapses and neurons of each layer are calculated and learned through the catenary ANN algorithm.

ETree is an algorithm very similar to RF and an improvement on Bagging. But ETree uses all of the samples, only the features are randomly selected. And ET obtains the bifurcation value completely randomly, while RF obtains the best bifurcation value within a random subset.

SVR is a dichotomous model whose purpose is to find a hyperplane to segment the samples. SVR sets a tolerance deviation on both sides of the linear function. All samples that fall into it do not calculate the loss, that is, only the support vector will affect its function model. Finally, it is obtained by minimizing the total loss and maximizing the total interval. out the optimized model.

LinearSVR is very similar to SVR, the only difference is that LinearSVR is a linear classification, does not support various low-dimensional to high-dimensional kernel functions, only supports linear kernel functions, and cannot be used for linearly inseparable data. But for linear data, LinearSVR does not need to adjust parameters to select the kernel function, and it is faster.

## **Genetic algorithm (GA)**

Genetic algorithm (GA) is a computational model that simulates the biological evolution process of Darwinian genetic selection and natural elimination. It is a method to search for the optimal solution by simulating the natural evolution process. Starting from a population that represents the possible potential solutions of the problem, after genetic coding, the next generation is generated by operations such as replication, mutation and crossover, and individuals with low fitness function values are gradually eliminated to form a population. In this way, iteratively controls the search adaptively, and finally obtains the best population.

## **Data augmentation**

In order to make the model get more sufficient data for training, we expanded the original dataset to generate a dataset with three times the size of the original dataset. The data expansion process is as follows:

- 1.Loading the original data set is recorded as L1, and creating a new storage space is recorded as L2.

- 2.Traverse each piece of data in L1, add random interference to the eigenvalues to form new samples, and add new samples to L2 and L3. Traverse each piece of data in L1, add random interference to the eigenvalues to form new samples, and add new samples to L2 and L3. In this step, we choose the form of Gaussian noise as the interference, and add the interference according to the features to ensure the accuracy of the model.

3.If the data in L2 and L3 space reaches the number of original data sets, go to step 4, otherwise return to step 2.

4.Randomly shuffle the order of data samples in L2 and L3 space, and store the original data to generate an expanded data set.

## Code abstract

```
from sklearn.preprocessing import StandardScaler
from sklearn.model_selection import cross_val_score, GridSearchCV
from sklearn import metrics
from sklearn import datasets
from sklearn.linear_model import LinearRegression
from sklearn.tree import DecisionTreeRegressor
from sklearn.ensemble import GradientBoostingRegressor
from sklearn.neural_network import MLPRegressor
from sklearn.ensemble import AdaBoostRegressor
from sklearn.ensemble import ExtraTreesRegressor
from sklearn.ensemble import RandomForestRegressor
from sklearn.svm import LinearSVR
from sklearn.svm import NuSVR
from sklearn.svm import SVR
from xgboost import XGBRegressor
from sklearn.metrics import accuracy_score
import numpy as np
import pandas as pd
import shap
import matplotlib.pyplot as plt
from sklearn.model_selection import train_test_split

df = pd.read_csv()
features = df.iloc[:,1:].values
target= df.iloc[:,0].values
X_train, X_test, y_train, y_test
=train_test_split(features,target,test_size=0.2,random_state=0)
model=randomforest.fit(X_train, y_train)
y_pred = randomforest.predict(X_test)
yt = randomforest.predict(X_train)
importances = list(model.feature_importances_)
feature_name = list(df.columns)[1:]
```

```

feature_importances = [(feature, round(importance, 2))
for feature, importance in zip(feature_name, importances)]
feature_importances = sorted(feature_importances, key = lambda x: x[1], reverse =
True)

```

```

estimator_list =[RandomForestRegressor(),
GradientBoostingRegressor(),
LinearRegression(),
DecisionTreeRegressor(),
MLPRegressor(solver='lbfgs'),
AdaBoostRegressor(),
ExtraTreesRegressor(),
LinearSVR(),
SVR(),
XGBRegressor(nthread = 15) ]
cv_split = ShuffleSplit(n_splits=3,test_size=0.2, random_state=18)
df_columns = ['Name', 'Parameters', 'Train Accuracy Mean', 'Test Accuracy Mean',
'TestAccuracyStd','ConsumedTime']
df = pd.DataFrame(columns=df_columns)

```

GA:

```

if __name__ == '__main__':
    for i in range(generations):
        obj_value = cal_obj_value(pop)
        fit_value = calfitvalue(obj_value)
        [best_individual, best_fit] = best(pop, fit_value)
        temp_n_estimator, temp_max_depth = b2d(best_individual)
        results.append([best_fit,temp_n_estimator,temp_max_depth])
        selection(pop, fit_value)
        crossover(pop, pc)
        mutation(pop, pc)
    results.sort()
    print(results[-1])

```

PLOT:

```

fontsize=12
plt.figure(figsize=(3.5,3))
plt.style.use('default')

```

```
plt.rc('xtick', labels=fontsize)
plt.rc('ytick', labels=fontsize)
plt.rcParams['font.family']="Arial"
a = plt.scatter(y_train, yt, s=25,c='LightSkyBlue')
b = plt.scatter(y_test, y_pred, s=25,c='PaleGreen')
plt.tick_params(direction='in')
plt.legend((a,b),('Train','Test'),fontsize=fontsize,handletextpad=0.1,borderpad=0.1)
plt.rcParams['font.family']="Arial"
plt.plot([0.5,1.7],[0.5,1.7],"--",color="black")
plt.tight_layout()
```

SHAP:

```
model.fit(X_test,y_test)
explainer = shap.TreeExplainer(model)
shap_values = explainer.shap_values(X_test)
shap_explainer = explainer(X_test)
shap_explainer.base_values=shap_explainer.base_values[0][0]
shap_explainer.data=shap_explainer.data[]
shap_explainer.values=shap_explainer.values[]
shap.initjs()
shap.summary_plot(shap_values.values,X_test,show = False,alpha = 0.6,max_display
= 15)
```
